# Supplementary material for: Prevention of sports injuries in children at school: a systematic review of policies
Source: PubMed Central journal article supplement — BMJ Open Sport Exerc Med. 2018 Jun 4;4(1):e000346. doi: 10.1136/bmjsem-2018-000346 (PMC6018845; doi:10.1136/bmjsem-2018-000346), 2018-06-04
Supplement: bmjsem-2018-000346supp001.pdf [file bmjsem-2018-000346supp001.pdf]

## Appendix 1

### Search Strategy

#### Population

1. exp student/
2. exp juvenile/
3. exp Young adult/
4. Adolescen\*.mp. [mp=title, abstract, heading word, drug trade name, original title, device manufacturer, drug manufacturer, device trade name, keyword]
5. Youth.mp. [mp=title, abstract, heading word, drug trade name, original title, device manufacturer, drug manufacturer, device trade name, keyword]
6. Child\*.mp. [mp=title, abstract, heading word, drug trade name, original title, device manufacturer, drug manufacturer, device trade name, keyword]
7. student\*.mp. [mp=title, abstract, heading word, drug trade name, original title, device manufacturer, drug manufacturer, device trade name, keyword]
8. pupil\*.mp. [mp=title, abstract, heading word, drug trade name, original title, device manufacturer, drug manufacturer, device trade name, keyword]
9. juvenile\*.mp. [mp=title, abstract, heading word, drug trade name, original title, device manufacturer, drug manufacturer, device trade name, keyword]
10. teen\*.mp. [mp=title, abstract, heading word, drug trade name, original title, device manufacturer, drug manufacturer, device trade name, keyword]
11. young people.mp. [mp=title, abstract, heading word, drug trade name, original title, device manufacturer, drug manufacturer, device trade name, keyword]
12. young person\*.mp. [mp=title, abstract, heading word, drug trade name, original title, device manufacturer, drug manufacturer, device trade name, keyword]
13. young adult\*.mp. [mp=title, abstract, heading word, drug trade name, original title, device manufacturer, drug manufacturer, device trade name, keyword]
14. minor\*.mp. [mp=title, abstract, heading word, drug trade name, original title, device manufacturer, drug manufacturer, device trade name, keyword]
15. 1 or 3 or 4 or 5 or 6 or 7 or 8 or 9 or 10 or 11 or 12 or 13 or 14

#### Exposure 1

16. Exp sport/
17. Exp physical activity/
18. Exp physical education/
19. Sport\*
20. athletic\*
21. Physical education
22. School adj games
23. Physical adj activit\*
24. 16 or 17 or 18 or 19 or 20 or 21 or 22 or 23

#### Exposure 2

25. exp education/
26. exp learning environment/
27. exp school/
28. School\*.mp. [mp=title, abstract, heading word, drug trade name, original title, device manufacturer, drug manufacturer, device trade name, keyword]
29. Curricul\*.mp. [mp=title, abstract, heading word, drug trade name, original title, device manufacturer, drug manufacturer, device trade name, keyword]
30. (teaching adj3 school\*).mp. [mp=title, abstract, heading word, drug trade name, original title, device manufacturer, drug manufacturer, device trade name, keyword]
31. 25 or 26 or 27 or 28 or 29 or 30

## Outcome

32. exp injury/
33. exp accident/
34. exp accident prevention/
35. injur\* OR Accident\* OR Traum\* OR wound\* OR fracture\* OR Concussion\*
36. 32 or 33 or 34 or 35

## Study Type

37. exp policy/
38. exp law/
39. policy.ti,ab.
40. policies.ti,ab.
41. guidance.ti,ab.
42. guideline\*.ti,ab.
43. legislat\*.ti,ab.
44. law\*.ti,ab.
45. protocol\*.ti,ab
46. 37 or 38 or 39 or 40 or 41 or 42 or 43 or 44 or 45

47. 15 and 24 and 31 and 36 and 46 = 550
