# Supplementary material for: Prevention of sports injuries in children at school: a systematic review of policies
Source: PubMed Central journal article supplement — BMJ Open Sport Exerc Med. 2018 Jun 4;4(1):e000346. doi: 10.1136/bmjsem-2018-000346 (PMC6018845; doi:10.1136/bmjsem-2018-000346), 2018-06-04
Supplement: bmjsem-2018-000346supp003.pdf [file bmjsem-2018-000346supp003.pdf]

## Appendix 3

### Modified TAPUPAS Quality Score

| TAPUPAS                                                                                                                                                                                                                                                                                                                                                                         | 3                                                                                                | 2                                                              | 1                                                         |
|---------------------------------------------------------------------------------------------------------------------------------------------------------------------------------------------------------------------------------------------------------------------------------------------------------------------------------------------------------------------------------|--------------------------------------------------------------------------------------------------|----------------------------------------------------------------|-----------------------------------------------------------|
| <b>Transparency:</b> the process of knowledge generation should be open to outside scrutiny. For knowledge to meet this standard, it should make plain how it was generated, clarifying aims, objectives and all the steps of the subsequent argument, so giving readers access to a common understanding of the underlying reasoning.                                          | transparent methods and freely available                                                         | Partial information on transparent methods or freely available | neither                                                   |
| <b>Accuracy:</b> all knowledge claims should be supported by and faithful to the events, experiences, informants and sources used in their production. For knowledge to meet this standard, it should demonstrate that all assertions, conclusions and recommendations are based upon relevant and appropriate information.                                                     | based on evidence with references                                                                | case reports and expert opinion                                | one person opinion or not stated                          |
| <b>Purposivity:</b> the approaches and methods used to gain knowledge should be appropriate to the task in hand, or 'fit for purpose'. For knowledge to meet this standard, it should demonstrate that the inquiry has followed the apposite approach to meet the stated objectives of the exercise.                                                                            | Methods completely appropriate                                                                   | Some methods were appropriate                                  | None of the methods were appropriate / methods not stated |
| <b>Utility:</b> knowledge should be appropriate to the decision setting in which it is intended to be used, and to the information need expressed by the seeker after knowledge. For knowledge to meet this standard, it should be 'fit for use', providing answers that are as closely matched as possible to the question.                                                    | fit for use                                                                                      | partially fit for use                                          | not fit for use                                           |
| <b>Propriety:</b> knowledge should be created and managed legally, ethically and with due care to all relevant stakeholders. For knowledge to meet this standard, it should present adequate evidence, appropriate to each point of contact, of the informed consent of relevant stakeholders. The release (or withholding) of information should also be subject to agreement. | knowledge developed in accordance with law and reference to appropriate ethical guiding policies | Some reference to law / ethical guidelines                     | No reference to law / ethical guidelines                  |
| <b>Accessibility:</b> knowledge should be presented in a way that meets the needs of the knowledge seeker. To meet this standard, no potential user should be excluded because of the presentational style employed.                                                                                                                                                            | easy to navigate and use                                                                         | moderately easy to navigate                                    | confusing                                                 |
| <b>Specificity:</b> the knowledge must pass muster within its own source domain, as perceived by its participants and proponents.                                                                                                                                                                                                                                               | specific to topic                                                                                | Some deviation away from primary topic                         | non specific                                              |
